# Supplementary material for: Association of Violence Against Female Sex Workers Who Use Drugs With Nonfatal Drug Overdose in Kazakhstan
Source: PubMed Central journal article supplement (PMC7550967; doi:10.1001/jamanetworkopen.2020.20802), 2020-10-12
Supplement: jamanetwopen-e2020802-s001.pdf [file jamanetwopen-e2020802-s001.pdf]

## Supplemental Online Content

El-Bassel N, Norcini Pala A, Mukherjee TI, et al. Association of violence against female sex workers who use drugs with nonfatal drug overdose in Kazakhstan. *JAMA Netw Open*. 2020;3(10):e2020802. doi:10.1001/jamanetworkopen.2020.20802

**eAppendix.** Supplemental Methods

**eTable 1.** Subtypes of Violence, Exploratory Factor Analysis

**eTable 2.** Factorial Model of the Subtypes of Violence: Exploratory Factor Analysis

**eTable 3.** Recent IPV and GBV 3-Factor Models: Exploratory Structural Equation Model (ESEM)

**eReferences.**

This supplemental material has been provided by the authors to give readers additional information about their work.

## **eAppendix. Supplemental Methods**

### ***Exploratory Factor Analysis***

To identify subtypes of lifetime experiences of violence, we performed Exploratory Factor Analysis (EFA) using weighted least square mean and variance adjusted (WLS) and tetrachoric correlation matrix. We compared goodness-of-fit (GOF) indices of 1-, 2-, and 3-factor, selecting the factorial model associated with the best GOF indices and factor interpretability. GOF indices included:  $\chi^2$  statistic, Comparative Fit Index (CFI), Tucker-Lewis Index (TLI), and Root Mean Square Error of Approximation (RMSEA). Indices' cut-offs were non-significant  $\chi^2$  ( $p > 0.05$ ); CFI/TLI  $\geq 0.95$ ; and RMSEA  $\leq 0.05$ .<sup>1</sup>

The 3-factor model was associated with optimal GOF indices, particularly statistically non-significant  $\chi^2$  (eTable 1). Factor loadings for each item was examined (eTable 2), and items were allowed to cross-load onto factors if they loaded  $> 0.30$ . Specifically, we identified a hierarchical model, which consists of a general factor and two group factors. The general factor accounts for most of all items' variance, namely all items loaded onto the general factor. Group factors explain the items' residual variance unexplained by the general factor. Subsequently, we tested whether the same lifetime violence subtypes (i.e., 3-factor hierarchical model) applied to recent experiences of violence, IPV and GBV using Exploratory Structural Equation Modeling (ESEM; see eTable 3). ESEM is a flexible method combining confirmatory and exploratory factor analysis.<sup>2</sup> While confirmatory factor analysis sets cross-loadings to 0, ESEM allows cross-loadings to be approximately 0. Cross-loadings set to 0 in confirmatory factor analysis negatively affects estimation of the factors and inflates factor inter-correlation. These issues are addressed through ESEM.

### ***Hierarchical factorial model***

Through EFA, we identified factors that quantify the probability of co-occurrence of different violence experiences (see Table 2). The Multiple types of violence factor accounts for the largest proportion of co-occurrence of all forms of violence. The other two factors account for the co-occurrence probability of specific subtypes of violence (i.e. Severe physical violence and Sexual coercion), which is not explained by the first factor. For example, because all violence experiences load onto the Multiple types of violence factor, a higher score on this factor indicates a higher probability of experiencing psychological, physical, and sexual forms of violence. A higher score on the Severe Physical Violence factor suggests a higher probability of co-occurring physical violence experience. Other studies used a similar approach to investigate diverse types of violence (e.g. IPV, microaggression).<sup>3</sup>

### ***Factor Scores***

We generated factor scores for two main reasons. The first is that the hierarchical model cannot be captured using raw scores (i.e., sum of each violence event). The identified factors quantify the probabilities of co-occurrence of all types of violence or two specific subtypes (physical and sexual). Factor scores are representations of the probability of experiencing a given violence experience. Secondly, unlike factor scores, raw scores do not account for measurement error, namely the proportion of variability due to random or systematic fluctuations/bias. The generation of factor scores and subsequent analysis through other statistical techniques is a

common procedure.<sup>4</sup> Factor scores quantify the probabilities of violence experiences, which are predictors of OD in the multinomial logistic regression.

**eTable 1. Subtypes of Violence, Exploratory Factor Analysis**

| <b>Factorial models</b> | $\chi^2$ | <b>d<br/>f</b> | <b>p-values</b> | <b>RMSEA</b> | <b>CFI</b> | <b>TLI</b> |
|-------------------------|----------|----------------|-----------------|--------------|------------|------------|
| 1-factor                | 233.19   | 9<br>0         | <0.001          | 0.06         | 0.98       | 0.97       |
| 2-factor                | 100.29   | 7<br>6         | 0.030           | 0.03         | 1.00       | 0.99       |
| 3-factor                | 71.52    | 6<br>3         | 0.220           | 0.02         | 1.00       | 1.00       |

*RMSEA: Root mean square of approximation; CFI: Comparative Fit Index; TLI: Tucker-Lewis Index*

| <b>eTable 2. Factorial Model of the Subtypes of Violence: Exploratory Factor Analysis</b>                                                                                        |                                             |                                              |                                      |
|----------------------------------------------------------------------------------------------------------------------------------------------------------------------------------|---------------------------------------------|----------------------------------------------|--------------------------------------|
|                                                                                                                                                                                  | <b>Multi<br/>ple<br/>types<br/>violence</b> | <b>Severe<br/>physic<br/>al<br/>violence</b> | <b>Sexua<br/>l<br/>coerci<br/>on</b> |
| <i>Has anyone ever kicked you, slammed you against a wall, beaten you up, punched or kicked you, hit you with something that could hurt or burned or scalded you on purpose?</i> | <b>0.68</b>                                 | <b>0.59</b>                                  | 0.04                                 |
| <i>Did anyone ever break your bones, give you cuts, bruises or other injuries that required medical care because of a fight?</i>                                                 | <b>0.67</b>                                 | <b>0.54</b>                                  | 0.02                                 |
| <i>Has anyone ever choked you or used or threatened to use a knife or gun on you?</i>                                                                                            | <b>0.68</b>                                 | <b>0.51</b>                                  | 0.09                                 |
| <i>Has anyone ever prevented you from seeing family or friends, held you captive, stalked you, or verbally threatened to hurt you or your family?</i>                            | <b>0.67</b>                                 | <b>0.39</b>                                  | -0.14                                |
| <i>Has anyone ever twisted your arm, or thrown something at you that could hurt, or pushed, grabbed or slapped you?</i>                                                          | <b>0.74</b>                                 | <b>0.32</b>                                  | 0.13                                 |
| <i>Has anyone ever caused a permanent physical disfigurement of your body?</i>                                                                                                   | <b>0.64</b>                                 | <b>0.30</b>                                  | -0.07                                |
| <i>Has anyone ever insisted you have sex even though you didn't want to?</i>                                                                                                     | <b>0.83</b>                                 | 0.15                                         | <b>0.41</b>                          |
| <i>Has anyone ever forced you to have sex without a condom?</i>                                                                                                                  | <b>0.72</b>                                 | 0.05                                         | <b>0.40</b>                          |
| <i>Has anyone ever used force or threatened to use force to have sex?</i>                                                                                                        | <b>0.89</b>                                 | 0.05                                         | <b>0.37</b>                          |
| <i>Has anyone ever used force or threatened to use force to make you have sex with other men in exchange for money or drugs?</i>                                                 | <b>0.74</b>                                 | -0.10                                        | <b>0.32</b>                          |
| <i>Has anyone ever kept you isolated in a room (e.g. kept you from leaving), against your will?</i>                                                                              | <b>0.87</b>                                 | 0.12                                         | -0.20                                |
| <i>Has anyone ever deprived you of food, water, or sleep?</i>                                                                                                                    | <b>0.73</b>                                 | 0.18                                         | -0.18                                |
| <i>Has anyone ever penetrated your vagina or anus with an object?</i>                                                                                                            | <b>0.71</b>                                 | -0.17                                        | 0.09                                 |
| <i>Has anyone ever forced you to remove or stripped off your clothing?</i>                                                                                                       | <b>0.83</b>                                 | 0.04                                         | 0.10                                 |
| <i>Has anyone ever tied up or blindfolded you?</i>                                                                                                                               | <b>0.66</b>                                 | -0.07                                        | -0.04                                |
| <i>Geomin orthogonal rotation; In bold, the factor loadings greater than 0.3</i>                                                                                                 |                                             |                                              |                                      |

| <b>eTable 3. Recent IPV and GBV 3-Factor Models: Exploratory Structural Equation Model (ESEM)</b>                                                                |          |                |                |            |            |              |  |
|------------------------------------------------------------------------------------------------------------------------------------------------------------------|----------|----------------|----------------|------------|------------|--------------|--|
|                                                                                                                                                                  | $\chi^2$ | <b>d<br/>f</b> | <b>p-value</b> | <b>CFI</b> | <b>TLI</b> | <b>RMSEA</b> |  |
| 3-factor model - Recent IPV                                                                                                                                      | 69.291   | 6<br>3         | 0.270          | 1.00       | 0.9<br>9   | 0.022        |  |
| 3-factor model - Recent GBV                                                                                                                                      | 53.919   | 6<br>3         | 0.790          | 1.00       | 1.0<br>0   | <0.001       |  |
| <i>RMSEA: Root mean square of approximation; CFI: Comparative Fit Index; TLI: Tucker-Lewis Index; IPV: Intimate partner violence; GBV: Gender-based violence</i> |          |                |                |            |            |              |  |

## eReferences.

1. Schermelleh-Engel K, Moosbrugger H, Müller H. Evaluating the Fit of Structural Equation Models: Tests of Significance and Descriptive Goodness-of-Fit Measures. *Methods of Psychological Research Online*. 2003;8:23-74.
2. Asparouhov T, Muthén B. Exploratory structural equation modeling. *Structural equation modeling: a multidisciplinary journal*. 2009;16(3):397-438.
3. Gracia E, Rodriguez CM, Martín-Fernández M, Lila M. Acceptability of family violence: Underlying ties between intimate partner violence and child abuse. *Journal of interpersonal violence*. 2017:0886260517707310.
4. DiStefano C, Zhu M, Mindrila D. Understanding and using factor scores: Considerations for the applied researcher. *Practical Assessment, Research, and Evaluation*. 2009;14(1):20.
